# Supplementary material for: Racial Disparities in Breast Cancer Treatments and Adverse Events in the SEER-Medicare Data
Source: MDPI journal article supplement (doi:10.3390/cancers15174333), 2023-08-30
Supplement: s1 [file s1]

## Supplementary Tables

**Table S1. Distribution of patient characteristics, tumor markers, treatments and AEs in stage I-III Outpatient dataset patients.**

|                                                                                                                                                                                                                               |          |        |      |      |      |     |         |       |        |       |
|-------------------------------------------------------------------------------------------------------------------------------------------------------------------------------------------------------------------------------|----------|--------|------|------|------|-----|---------|-------|--------|-------|
| Stage I-III Outpatient                                                                                                                                                                                                        |          |        |      |      |      |     |         |       |        |       |
|                                                                                                                                                                                                                               | Patients | %      | Age  | SD   | COMB | SD  | TR      | TR/PT | AE     | AE/TR |
| All                                                                                                                                                                                                                           | 243,814  |        | 67.6 | 11.0 | 4.2  | 2.8 | 224,923 | 0.9   | 84,390 | 0.38  |
| ER/PR+                                                                                                                                                                                                                        | 185,236  | 83.1%  | 68.3 | 10.6 | 4.2  | 2.8 | 149,715 | 0.8   | 55,023 | 0.37  |
| ER/PR-                                                                                                                                                                                                                        | 37,572   | 16.9%  | 65.0 | 11.6 | 4.0  | 4.0 | 64,158  | 1.7   | 25,544 | 0.40  |
| ER/PR +/- Total                                                                                                                                                                                                               | 222,808  | 100.0% |      |      |      |     |         |       |        |       |
| %ER/PR annotated                                                                                                                                                                                                              | 91.4%    |        |      |      |      |     |         |       |        |       |
| Her2-                                                                                                                                                                                                                         | 62,266   | 87.8%  | 71.3 | 9.5  | 4.1  | 2.8 | 61,957  | 1.0   | 24,728 | 0.40  |
| Her2+                                                                                                                                                                                                                         | 8,682    | 12.2%  | 69.4 | 10.6 | 4.0  | 2.9 | 38,424  | 4.4   | 14,487 | 0.38  |
| Her2-/+ Total                                                                                                                                                                                                                 | 70,948   | 100.0% |      |      |      |     |         |       |        |       |
| % Her2 annotated                                                                                                                                                                                                              | 29.1%    |        |      |      |      |     |         |       |        |       |
| W                                                                                                                                                                                                                             |          |        |      |      |      |     |         |       |        |       |
| All                                                                                                                                                                                                                           | 205,328  |        | 68.0 | 10.8 | 4.2  | 2.8 | 172,130 | 0.8   | 64,412 | 0.37  |
| ER/PR+                                                                                                                                                                                                                        | 158,847  | 84.6%  | 68.6 | 10.5 | 4.2  | 2.8 | 119,177 | 0.8   | 43,745 | 0.37  |
| ER/PR-                                                                                                                                                                                                                        | 28,870   | 15.4%  | 65.8 | 11.4 | 4.0  | 2.8 | 45,101  | 1.6   | 17,893 | 0.40  |
| ER/PR +/- Total                                                                                                                                                                                                               | 187,717  | 100.0% |      |      |      |     |         |       |        |       |
| %ER/PR annotated                                                                                                                                                                                                              | 91.4%    |        |      |      |      |     |         |       |        |       |
| Her2-                                                                                                                                                                                                                         | 51,500   | 88.3%  | 71.8 | 9.2  | 4.1  | 2.8 | 47,397  | 0.9   | 18,868 | 0.40  |
| Her2+                                                                                                                                                                                                                         | 6,838    | 11.7%  | 70.2 | 10.2 | 4.0  | 2.9 | 29,439  | 4.3   | 11,283 | 0.38  |
| Her2-/+ Total                                                                                                                                                                                                                 | 58,338   | 100.0% |      |      |      |     |         |       |        |       |
| % Her2 annotated                                                                                                                                                                                                              | 28.4%    |        |      |      |      |     |         |       |        |       |
| AA                                                                                                                                                                                                                            |          |        |      |      |      |     |         |       |        |       |
| All                                                                                                                                                                                                                           | 24,664   |        | 64.6 | 12.3 | 4.5  | 2.9 | 40,931  | 1.7   | 15,952 | 0.39  |
| ER/PR+                                                                                                                                                                                                                        | 15,933   | 71.1%  | 65.9 | 12.1 | 4.5  | 2.9 | 22,341  | 1.4   | 8,558  | 0.38  |
| ER/PR-                                                                                                                                                                                                                        | 6,473    | 28.9%  | 61.8 | 12.3 | 4.2  | 2.9 | 15,858  | 2.4   | 6,425  | 0.41  |
| ER/PR +/- Total                                                                                                                                                                                                               | 22,406   | 100.0% |      |      |      |     |         |       |        |       |
| %ER/PR annotated                                                                                                                                                                                                              | 90.8%    |        |      |      |      |     |         |       |        |       |
| Her2-                                                                                                                                                                                                                         | 7,117    | 85.3%  | 68.0 | 11.4 | 4.4  | 3.0 | 12,037  | 1.7   | 4,932  | 0.41  |
| Her2+                                                                                                                                                                                                                         | 1,226    | 14.7%  | 65.4 | 12.1 | 4.1  | 3.0 | 6,750   | 5.5   | 2,551  | 0.38  |
| Her2-/+ Total                                                                                                                                                                                                                 | 8,343    | 100.0% |      |      |      |     |         |       |        |       |
| % Her2 annotated                                                                                                                                                                                                              | 33.8%    |        |      |      |      |     |         |       |        |       |
| Legend: AA: African American patients, AE: adverse events, COMB: comorbidities, ER: estrogen receptor, Her2: Human Epidermal Growth Factor Receptor 2, PT: patients, SD: standard deviation, TR: treatment, W: white patients |          |        |      |      |      |     |         |       |        |       |

**Table S2. Distribution of patient characteristics, tumor markers, treatments and AEs in stage I-III NCH dataset patients.**

|                                                                                                                                                                                                                               |          |        |      |      |      |     |         |       |         |       |
|-------------------------------------------------------------------------------------------------------------------------------------------------------------------------------------------------------------------------------|----------|--------|------|------|------|-----|---------|-------|---------|-------|
| Stage I-III                                                                                                                                                                                                                   |          |        |      |      |      |     |         |       |         |       |
| NCH                                                                                                                                                                                                                           |          |        |      |      |      |     |         |       |         |       |
|                                                                                                                                                                                                                               | Patients | %      | Age  | SD   | COMB | SD  | TR      | TR/PT | AE      | AE/TR |
| All                                                                                                                                                                                                                           | 279,814  |        | 67.4 | 11.0 | 3.7  | 2.7 | 615,865 | 2.2   | 331,746 | 0.54  |
| ER/PR+                                                                                                                                                                                                                        | 212,751  | 83.2%  | 68.1 | 10.6 | 3.6  | 2.7 | 408,470 | 1.9   | 213,869 | 0.52  |
| ER/PR-                                                                                                                                                                                                                        | 43,099   | 16.8%  | 64.9 | 11.6 | 3.5  | 2.7 | 158,099 | 3.7   | 89,816  | 0.57  |
| ER/PR +/- Total                                                                                                                                                                                                               | 255,850  | 100.0% |      |      |      |     |         |       |         |       |
| %ER/PR annotated                                                                                                                                                                                                              | 91.4%    |        |      |      |      |     |         |       |         |       |
| Her2-                                                                                                                                                                                                                         | 71,962   | 87.9%  | 71.2 | 9.4  | 3.6  | 2.8 | 108,378 | 1.5   | 54,147  | 0.50  |
| Her2+                                                                                                                                                                                                                         | 9,925    | 12.1%  | 69.5 | 10.4 | 3.5  | 2.8 | 61,036  | 6.1   | 30,279  | 0.50  |
| Her2-/+ Total                                                                                                                                                                                                                 | 81,887   | 100.0% |      |      |      |     |         |       |         |       |
| % Her2 annotated                                                                                                                                                                                                              | 29.3%    |        |      |      |      |     |         |       |         |       |
| W                                                                                                                                                                                                                             |          |        |      |      |      |     |         |       |         |       |
| All                                                                                                                                                                                                                           | 234,768  |        | 67.8 | 10.8 | 3.6  | 2.7 | 523,677 | 2.2   | 279,242 | 0.53  |
| ER/PR+                                                                                                                                                                                                                        | 181,725  | 84.6%  | 68.4 | 10.5 | 3.6  | 2.7 | 356,643 | 2.0   | 184,905 | 0.52  |
| ER/PR-                                                                                                                                                                                                                        | 33,014   | 15.4%  | 65.6 | 11.4 | 3.5  | 2.6 | 126,816 | 3.8   | 71,920  | 0.57  |
| ER/PR +/- Total                                                                                                                                                                                                               | 214,739  | 100.0% |      |      |      |     |         |       |         |       |
| %ER/PR annotated                                                                                                                                                                                                              | 91.5%    |        |      |      |      |     |         |       |         |       |
| Her2-                                                                                                                                                                                                                         | 59,287   | 88.4%  | 71.7 | 9.1  | 3.6  | 2.7 | 91,285  | 1.5   | 45,204  | 0.50  |
| Her2+                                                                                                                                                                                                                         | 7,812    | 11.6%  | 70.2 | 10.0 | 3.5  | 2.8 | 51,289  | 6.6   | 25,388  | 0.49  |
| Her2-/+ Total                                                                                                                                                                                                                 | 67,099   | 100.0% |      |      |      |     |         |       |         |       |
| % Her2 annotated                                                                                                                                                                                                              | 28.6%    |        |      |      |      |     |         |       |         |       |
| AA                                                                                                                                                                                                                            |          |        |      |      |      |     |         |       |         |       |
| All                                                                                                                                                                                                                           | 27,743   |        | 64.6 | 12.2 | 4.0  | 2.9 | 56,982  | 2.1   | 32,322  | 0.57  |
| ER/PR+                                                                                                                                                                                                                        | 17,964   | 71.2%  | 65.9 | 11.9 | 4.1  | 2.9 | 30,486  | 1.7   | 17,210  | 0.56  |
| ER/PR-                                                                                                                                                                                                                        | 7,258    | 28.8%  | 61.9 | 12.2 | 3.9  | 2.8 | 20,709  | 2.9   | 11,733  | 0.57  |
| ER/PR +/- Total                                                                                                                                                                                                               | 25,222   | 100.0% |      |      |      |     |         |       |         |       |
| %ER/PR annotated                                                                                                                                                                                                              | 90.9%    |        |      |      |      |     |         |       |         |       |
| Her2-                                                                                                                                                                                                                         | 8,125    | 85.5%  | 68.0 | 11.2 | 4.0  | 3.0 | 11,146  | 1.4   | 5,943   | 0.53  |
| Her2+                                                                                                                                                                                                                         | 1,374    | 14.5%  | 65.7 | 11.9 | 3.8  | 2.9 | 5,090   | 3.7   | 2,315   | 0.45  |
| Her2-/+ Total                                                                                                                                                                                                                 | 9,499    | 100.0% |      |      |      |     |         |       |         |       |
| % Her2 annotated                                                                                                                                                                                                              | 34.2%    |        |      |      |      |     |         |       |         |       |
| Legend: AA: African American patients, AE: adverse events, COMB: comorbidities, ER: estrogen receptor, Her2: Human Epidermal Growth Factor Receptor 2, PT: patients, SD: standard deviation, TR: treatment, W: white patients |          |        |      |      |      |     |         |       |         |       |

**Table S3. Distribution of patient characteristics, tumor markers, treatments and AEs in stage IV Outpatient dataset patients.**

|                                                                                                                        |          |        |      |      |      |     |        |       |        |       |  |
|------------------------------------------------------------------------------------------------------------------------|----------|--------|------|------|------|-----|--------|-------|--------|-------|--|
| Stage IV                                                                                                               |          |        |      |      |      |     |        |       |        |       |  |
| Outpatient                                                                                                             |          |        |      |      |      |     |        |       |        |       |  |
|                                                                                                                        | Patients | %      | Age  | SD   | COMB | SD  | TR     | TR/PT | AE     | AE/TR |  |
| All                                                                                                                    | 8,664    |        | 68.6 | 12.4 | 3.8  | 2.9 | 44,102 | 5.1   | 15,203 | 0.34  |  |
| ER/PR+                                                                                                                 | 6,251    | 80.3%  | 68.5 | 12.4 | 3.8  | 2.8 | 32,545 | 5.2   | 11,256 | 0.35  |  |
| ER/PR-                                                                                                                 | 1,534    | 19.7%  | 68.0 | 12.5 | 3.9  | 3.0 | 9,058  | 5.9   | 3,108  | 0.34  |  |
| ER/PR +/- Total                                                                                                        | 7,785    | 100.0% |      |      |      |     |        |       |        |       |  |
| %ER/PR annotated                                                                                                       | 89.9%    |        |      |      |      |     |        |       |        |       |  |
| Her2-                                                                                                                  | 3,039    | 76.7%  | 70.7 | 11.4 | 4.0  | 2.9 | 13,445 | 4.4   | 5,099  | 0.38  |  |
| Her2+                                                                                                                  | 923      | 23.3%  | 67.3 | 12.9 | 3.6  | 2.9 | 7,863  | 8.5   | 2,228  | 0.28  |  |
| Her2-/+ Total                                                                                                          | 3,962    | 100.0% |      |      |      |     |        |       |        |       |  |
| % Her2 annotated                                                                                                       | 45.7%    |        |      |      |      |     |        |       |        |       |  |
| W                                                                                                                      |          |        |      |      |      |     |        |       |        |       |  |
| All                                                                                                                    | 6,947    |        | 69.4 | 12.1 | 3.8  | 2.8 | 34,454 | 5.0   | 11,834 | 0.34  |  |
| ER/PR+                                                                                                                 | 5,109    | 81.6%  | 69.3 | 12.0 | 3.8  | 2.8 | 25,996 | 5.1   | 8,902  | 0.34  |  |
| ER/PR-                                                                                                                 | 1,149    | 18.4%  | 68.6 | 12.3 | 3.8  | 3.0 | 6,295  | 5.5   | 2,196  | 0.35  |  |
| ER/PR +/- Total                                                                                                        | 6,258    | 100.0% |      |      |      |     |        |       |        |       |  |
| %ER/PR annotated                                                                                                       | 90.1%    |        |      |      |      |     |        |       |        |       |  |
| Her2-                                                                                                                  | 2,435    | 77.3%  | 71.4 | 11.0 | 4.0  | 2.8 | 10,786 | 4.4   | 4,062  | 0.38  |  |
| Her2+                                                                                                                  | 714      | 22.7%  | 68.3 | 12.4 | 3.6  | 2.9 | 6,084  | 8.5   | 1,715  | 0.28  |  |
| Her2-/+ Total                                                                                                          | 3,149    | 100.0% |      |      |      |     |        |       |        |       |  |
| % Her2 annotated                                                                                                       | 45.3%    |        |      |      |      |     |        |       |        |       |  |
| AA                                                                                                                     |          |        |      |      |      |     |        |       |        |       |  |
| All                                                                                                                    | 1,293    |        | 65.3 | 13.4 | 4.0  | 2.9 | 7,483  | 5.8   | 2,817  | 0.38  |  |
| ER/PR+                                                                                                                 | 824      | 72.3%  | 65.1 | 13.6 | 3.9  | 2.9 | 5,012  | 6.1   | 1,990  | 0.40  |  |
| ER/PR-                                                                                                                 | 316      | 27.7%  | 65.2 | 13.1 | 4.2  | 3.1 | 2,165  | 6.9   | 727    | 0.34  |  |
| ER/PR +/- Total                                                                                                        | 1,140    | 100.0% |      |      |      |     |        |       |        |       |  |
| %ER/PR annotated                                                                                                       | 88.2%    |        |      |      |      |     |        |       |        |       |  |
| Her2-                                                                                                                  | 455      | 73.7%  | 68.0 | 12.2 | 4.3  | 3.1 | 2,069  | 4.5   | 865    | 0.42  |  |
| Her2+                                                                                                                  | 162      | 26.3%  | 63.4 | 14.0 | 3.5  | 2.7 | 1,358  | 8.4   | 390    | 0.29  |  |
| Her2-/+ Total                                                                                                          | 617      | 100.0% |      |      |      |     |        |       |        |       |  |
| % Her2 annotated                                                                                                       | 47.7%    |        |      |      |      |     |        |       |        |       |  |
| Legend: AA: African American patients, AE: adverse events, COMB: comorbidities, ER: estrogen receptor,                 |          |        |      |      |      |     |        |       |        |       |  |
| Her2: Human Epidermal Growth Factor Receptor 2, PT: patients, SD: standard deviation, TR: treatment, W: white patients |          |        |      |      |      |     |        |       |        |       |  |

**Table S4. Distribution of patient characteristics, tumor markers, treatments and AEs in stage IV NCH dataset patients.**

|                                                                                                                                                                                                                                |          |        |      |      |      |     |        |       |        |       |
|--------------------------------------------------------------------------------------------------------------------------------------------------------------------------------------------------------------------------------|----------|--------|------|------|------|-----|--------|-------|--------|-------|
| Stage IV<br>NCH                                                                                                                                                                                                                |          |        |      |      |      |     |        |       |        |       |
|                                                                                                                                                                                                                                | Patients | %      | Age  | SD   | COMB | SD  | TR     | TR/PT | AE     | AE/TR |
| All                                                                                                                                                                                                                            | 9,913    |        | 68.9 | 12.3 | 3.5  | 2.7 | 91,106 | 9.2   | 50,181 | 0.55  |
| ER/PR+                                                                                                                                                                                                                         | 7,133    | 80.3%  | 68.8 | 12.3 | 3.4  | 2.7 | 64,368 | 9.0   | 35,506 | 0.55  |
| ER/PR-                                                                                                                                                                                                                         | 1,755    | 19.7%  | 68.4 | 12.3 | 3.6  | 2.9 | 18,320 | 10.4  | 10,175 | 0.56  |
| ER/PR +/- Total                                                                                                                                                                                                                | 8,888    | 100.0% |      |      |      |     |        |       |        |       |
| %ER/PR annotated                                                                                                                                                                                                               | 89.7%    |        |      |      |      |     |        |       |        |       |
| Her2-                                                                                                                                                                                                                          | 3,553    | 77.2%  | 70.9 | 11.2 | 3.6  | 2.8 | 14,480 | 4.1   | 7,584  | 0.52  |
| Her2+                                                                                                                                                                                                                          | 1,047    | 22.8%  | 67.7 | 12.7 | 3.3  | 2.8 | 11,812 | 11.3  | 6,210  | 0.53  |
| Her2-/+ Total                                                                                                                                                                                                                  | 4,600    | 100.0% |      |      |      |     |        |       |        |       |
| % Her2 annotated                                                                                                                                                                                                               | 46.4%    |        |      |      |      |     |        |       |        |       |
| W                                                                                                                                                                                                                              |          |        |      |      |      |     |        |       |        |       |
| All                                                                                                                                                                                                                            | 7,942    |        | 69.5 | 12.0 | 3.5  | 2.7 | 78,805 | 9.9   | 43,512 | 0.55  |
| ER/PR+                                                                                                                                                                                                                         | 5,817    | 81.6%  | 69.5 | 11.9 | 3.4  | 2.7 | 56,953 | 9.8   | 31,688 | 0.56  |
| ER/PR-                                                                                                                                                                                                                         | 1,310    | 18.4%  | 69.0 | 12.1 | 3.5  | 2.8 | 14,306 | 10.9  | 7,851  | 0.55  |
| ER/PR +/- Total                                                                                                                                                                                                                | 7,127    | 100.0% |      |      |      |     |        |       |        |       |
| %ER/PR annotated                                                                                                                                                                                                               | 89.7%    |        |      |      |      |     |        |       |        |       |
| Her2-                                                                                                                                                                                                                          | 2,843    | 77.9%  | 71.6 | 10.9 | 3.5  | 2.8 | 11,603 | 4.1   | 6,096  | 0.53  |
| Her2+                                                                                                                                                                                                                          | 808      | 22.1%  | 68.7 | 12.2 | 3.3  | 2.8 | 10,577 | 13.1  | 5,534  | 0.52  |
| Her2-/+ Total                                                                                                                                                                                                                  | 3,651    | 100.0% |      |      |      |     |        |       |        |       |
| % Her2 annotated                                                                                                                                                                                                               | 46.0%    |        |      |      |      |     |        |       |        |       |
| AA                                                                                                                                                                                                                             |          |        |      |      |      |     |        |       |        |       |
| All                                                                                                                                                                                                                            | 1,468    |        | 65.6 | 13.1 | 3.7  | 2.8 | 7,927  | 5.4   | 4,214  | 0.53  |
| ER/PR+                                                                                                                                                                                                                         | 946      | 72.7%  | 65.4 | 13.3 | 3.5  | 2.8 | 5,023  | 5.3   | 2,629  | 0.52  |
| ER/PR-                                                                                                                                                                                                                         | 356      | 27.3%  | 65.6 | 12.8 | 3.9  | 2.9 | 2,289  | 6.4   | 1,233  | 0.54  |
| ER/PR +/- Total                                                                                                                                                                                                                | 1,302    | 100.0% |      |      |      |     |        |       |        |       |
| %ER/PR annotated                                                                                                                                                                                                               | 88.7%    |        |      |      |      |     |        |       |        |       |
| Her2-                                                                                                                                                                                                                          | 531      | 74.4%  | 68.1 | 11.9 | 3.8  | 3.0 | 2,042  | 3.8   | 1,087  | 0.53  |
| Her2+                                                                                                                                                                                                                          | 183      | 25.6%  | 64.0 | 13.8 | 3.4  | 2.7 | 602    | 3.3   | 293    | 0.49  |
| Her2-/+ Total                                                                                                                                                                                                                  | 714      | 100.0% |      |      |      |     |        |       |        |       |
| % Her2 annotated                                                                                                                                                                                                               | 48.6%    |        |      |      |      |     |        |       |        |       |
| Legend: AA: African American patients, AE: adverse events, COMB: comorbidities, ER: estrogen receptor, Her2: Human Epidermal Growth Facacor Receptor 2, PT: patients, SD: standard deviation, TR: treatment, W: white patients |          |        |      |      |      |     |        |       |        |       |

**Table S5. Treatments associated with common AE differences in Stage I-III Outpatient vs. NCH.**

| Outpatient                     |        |             |                        |         | NCH                            |         |             |                        |         |
|--------------------------------|--------|-------------|------------------------|---------|--------------------------------|---------|-------------|------------------------|---------|
| Nausea/vomiting - 26.1% of AEs |        |             |                        |         | Nausea/vomiting - 53.4% of AEs |         |             |                        |         |
| Treatment                      | Pts.   | Age + SD    | Comorbidity Index + SD | TR Freq | Treatment                      | Pts.    | Age + SD    | Comorbidity Index + SD | TR Freq |
| Taxane                         | 5,429  | 62.9 + 10.4 | 4.0 + 2.5              | 24.6%   | Taxanes                        | 42,133  | 65.5 + 9.6  | 4.0 + 2.4              | 23.8%   |
| Anthracyclines                 | 3,415  | 63.1 + 9.4  | 3.9 + 2.3              | 15.5%   | Anthracyclines                 | 31,239  | 66.0 + 8.5  | 4.2 + 2.3              | 17.7%   |
| Her2 targeting agts            | 3,187  | 62.4 + 11.6 | 4.0 + 2.5              | 14.4%   | Pyrimidine analogs             | 24,838  | 66.0 + 10.5 | 4.5 + 2.5              | 14.0%   |
| Platinum cmpds.                | 2,613  | 61.9 + 11.2 | 3.7 + 2.3              | 11.8%   | Her2 targeting agts.           | 20,700  | 65.9 + 10.3 | 4.2 + 2.5              | 11.7%   |
| Pyrimidine analogs             | 1,907  | 60.3 + 12.4 | 3.9 + 2.5              | 8.6%    | Alkylating agents              | 15,713  | 66.8 + 8.4  | 4.1 + 2.4              | 8.9%    |
| Alkylating agents              | 1,897  | 64.7 + 9.4  | 4.1 + 2.5              | 8.6%    | Platinum cmpds                 | 14,367  | 64.7 + 10.2 | 4.1 + 2.4              | 8.1%    |
| Total tallied                  | 18,448 |             |                        | 83.6%   | Folate analogs                 | 9,248   | 69.1 + 8.7  | 5.0 + 2.5              | 5.2%    |
|                                |        |             |                        |         | Total tallied                  | 158,238 |             |                        | 89.4%   |
| Mean+SD TR pts                 |        | 62.3 + 11.2 | 4.1 + 2.5              |         |                                |         | 65.9 + 9.7  | 4.3 + 2.4              |         |

| Outpatient                                |        |             |                        |         | NCH                                      |        |             |                        |         |
|-------------------------------------------|--------|-------------|------------------------|---------|------------------------------------------|--------|-------------|------------------------|---------|
| Weakness/malaise, delirium - 23.4% of AEs |        |             |                        |         | Weakness/malaise, delirium - 8.9% of AEs |        |             |                        |         |
| Treatment                                 | Pts    | Age + SD    | Comorbidity Index + SD | TR Freq | Treatment                                | Pts.   | Age + SD    | Comorbidity Index + SD | TR Freq |
| Taxanes                                   | 4,233  | 63.7 + 10.4 | 4.0 + 2.5              | 21.4%   | Her2 targeting agts.                     | 6,783  | 66.5 + 10.7 | 4.5 + 2.5              | 22.9%   |
| Her2 targeting agts.                      | 4,082  | 64.7 + 11.3 | 4.2 + 2.6              | 20.6%   | Taxanes                                  | 5,261  | 65.2 + 9.6  | 4.4 + 2.5              | 17.8%   |
| Bisphosphonates                           | 2,739  | 62.9 + 11.8 | 4.6 + 2.6              | 13.8%   | Bisphosphonates                          | 4,838  | 66.3 + 11.1 | 4.8 + 2.5              | 16.3%   |
| Anthracyclines                            | 1,947  | 64.4 + 9.0  | 4.0 + 2.3              | 9.8%    | Antiestrogens                            | 2,528  | 66.4 + 10.5 | 4.9 + 2.4              | 8.5%    |
| Platinum cmpds.                           | 1,741  | 62.7 + 11.6 | 4.1 + 2.3              | 8.8%    | Anthracyclines                           | 2,230  | 65.0 + 8.8  | 4.6 + 2.3              | 7.5%    |
| Antiestrogen                              | 1,313  | 63.6 + 13.2 | 5.1 + 2.8              | 6.6%    | Pyrimidine analogs                       | 2,115  | 65.7 + 10.2 | 4.7 + 2.5              | 7.1%    |
| Total tallied                             | 16,055 |             |                        | 81.2%   | Platinum cmpds.                          | 1,672  | 65.1 + 10.4 | 4.4 + 2.5              | 5.6%    |
|                                           |        |             |                        |         | Total tallied                            | 25,427 |             |                        | 85.9%   |
| Mean+SD TR pts                            |        | 64.1 + 11.2 | 4.4 + 2.6              |         |                                          |        | 66.9 + 10.5 | 4.8 + 2.5              |         |

| Outpatient                            |          |             |                        |         | NCH                                  |        |             |           |         |
|---------------------------------------|----------|-------------|------------------------|---------|--------------------------------------|--------|-------------|-----------|---------|
| Neutropenia/Leukopenia - 15.7% of AEs |          |             |                        |         | Neutropenia/Leukopenia - 8.8% of AEs |        |             |           |         |
| Treatment                             | Patients | Age + SD    | Comorbidity Index + SD | TR Freq | Treatment                            | Pts.   | Age + SD    | Age + SD  | TR Freq |
| Taxanes                               | 4,225    | 63.9 + 10.5 | 3.9 + 2.4              | 31.8%   | Taxanes                              | 8,132  | 66.0 + 9.2  | 4.0 + 2.4 | 27.7%   |
| Alkylating agents                     | 2,203    | 65.6 + 9.4  | 4.1 + 2.4              | 16.6%   | Anthracyclines                       | 4,599  | 65.8 + 8.6  | 4.0 + 2.3 | 15.7%   |
| Her2 targeting agts.                  | 1,796    | 64.2 + 10.6 | 4.1 + 2.4              | 13.5%   | Her2 targeting agts.                 | 4,507  | 65.9 + 10.1 | 4.1 + 2.4 | 15.4%   |
| Anthracyclines                        | 1,607    | 63.8 + 9.6  | 4.0 + 2.3              | 12.1%   | Platinum cmpds.                      | 2,881  | 65.3 + 9.9  | 4.1 + 2.4 | 9.8%    |
| Platinum cmpds.                       | 1,035    | 63.5 + 10.7 | 4.0 + 2.4              | 7.8%    | Alkylating agents                    | 2,847  | 66.5 + 8.6  | 3.9 + 2.4 | 9.7%    |
| Pyrimidine analogs                    | 880      | 62.1 + 11.9 | 4.1 + 2.5              | 6.6%    | Pyrimidine analogs                   | 2,245  | 64.4 + 12.0 | 4.3 + 2.5 | 7.7%    |
| Total tallied                         | 11,746   |             |                        | 88.5%   | Total tallied                        | 25,211 |             |           | 86.0%   |
| Mean+SD TR pts                        |          | 63.7 + 10.6 | 4.0 + 2.4              |         |                                      |        | 65.6 + 9.6  | 4.0 + 2.4 |         |

| Outpatient                              |       |             |                        |         | NCH                                     |        |             |                        |         |
|-----------------------------------------|-------|-------------|------------------------|---------|-----------------------------------------|--------|-------------|------------------------|---------|
| Electrolyte abnormalities - 4.5% of AEs |       |             |                        |         | Electrolyte abnormalities - 9.3% of AEs |        |             |                        |         |
| Treatment                               | Pts.  | Age + SD    | Comorbidity Index + SD | TR Freq | Treatment                               | Pts    | Age + SD    | Comorbidity Index + SD | TR Freq |
| Taxanes                                 | 1,167 | 64.1 + 10.7 | 4.1 + 2.5              | 30.6%   | Taxanes                                 | 7,116  | 64.7 + 10.1 | 4.2 + 2.4              | 23.0%   |
| Her2 targeting agts.                    | 657   | 64.5 + 10.9 | 4.2 + 2.4              | 17.2%   | Her2 targeting agts.                    | 5,701  | 65.3 + 10.9 | 4.3 + 2.5              | 18.5%   |
| Alkylating agents                       | 472   | 66.5 + 9.2  | 4.0 + 2.5              | 12.4%   | Pyrimidine analogs                      | 3,345  | 63.3 + 11.8 | 4.4 + 2.6              | 10.8%   |
| Platinum cmpds.                         | 355   | 63.6 + 11.4 | 4.0 + 2.3              | 9.3%    | Alkylating agents                       | 2,521  | 65.9 + 9.3  | 4.2 + 2.5              | 8.2%    |
| Anthracyclines                          | 327   | 63.8 + 9.5  | 3.8 + 2.3              | 8.6%    | Anthracyclines                          | 2,492  | 65.0 + 9.3  | 4.1 + 2.4              | 8.1%    |
| Bisphosphonates                         | 252   | 61.6 + 12.5 | 4.1 + 2.5              | 6.6%    | Platinum cmpds.                         | 2,205  | 64.0 + 10.7 | 4.2 + 2.3              | 7.1%    |
| Pyrimidine analogs                      | 214   | 58.6 + 13.9 | 3.9 + 2.4              | 5.6%    | Vinca alkaloids                         | 1,974  | 59.9 + 12.5 | 3.7 + 2.5              | 6.4%    |
|                                         |       |             |                        |         | Bisphosphonates                         | 1,765  | 62.4 + 11.7 | 4.4 + 2.7              | 5.7%    |
| Total tallied                           | 3,444 |             |                        | 90.3%   | Total tallied                           | 27,119 |             |                        | 87.8%   |
| Mean+SD TR pts                          |       | 63.5 + 11.6 | 4.3 + 2.6              |         |                                         |        | 65.1 + 10.5 | 4.3 + 2.5              |         |



**Table S6. Treatments associated with common AE differences in Stage IV Outpatient v. NCH sets.**

| Outpatient                                 |       |             |                        |         | NCH                                       |       |             |                        |         |
|--------------------------------------------|-------|-------------|------------------------|---------|-------------------------------------------|-------|-------------|------------------------|---------|
| Weakness/ malaise, delirium - 24.5% of AEs |       |             |                        |         | Weakness/malaise, delirium – 11.9% of AEs |       |             |                        |         |
| Treatment                                  | Pts   | Age + SD    | Comorbidity Index + SD | TR Freq | Treatment                                 | Pts   | Age + SD    | Comorbidity Index + SD | TR Freq |
| Bisphosphonates                            | 1,098 | 64.8 + 12.6 | 4.1 + 2.9              | 29.4%   | Bisphosphonates                           | 1,579 | 67.4 + 11.0 | 4.4 + 2.8              | 26.3%   |
| Her2 targeting agts.                       | 719   | 63.3 + 11.0 | 3.3 + 2.5              | 19.3%   | Her2 targeting agts.                      | 1,196 | 65.5 + 12.6 | 4.1 + 2.6              | 20.0%   |
| Taxanes                                    | 661   | 63.6 + 11.7 | 3.6 + 2.5              | 17.7%   | Taxane                                    | 929   | 66.6 + 10.7 | 4.5 + 2.8              | 15.5%   |
| Antiestrogens                              | 363   | 69.5 + 12.2 | 4.8 + 2.9              | 9.7%    | Antiestrogen                              | 582   | 68.9 + 10.5 | 4.9 + 2.7              | 9.7%    |
| Platinum cmpds.                            | 235   | 60.3 + 12.3 | 3.5 + 2.6              | 6.3%    | Pyrimidine analogs                        | 542   | 65.1 + 11.0 | 4.1 + 2.5              | 9.0%    |
| Pyrimidine analogs                         | 165   | 63.5 + 13.1 | 3.7 + 2.8              | 4.4%    | Platinum cmpds.                           | 248   | 65.3 + 11.3 | 3.7 + 1.9              | 4.1%    |
|                                            | 3,241 |             |                        | 86.9%   | Total tallied                             | 5,076 |             |                        | 84.7%   |
| Mean+SD TR pts                             |       | 64.8 + 11.9 | 3.9 + 2.8              |         | Mean+SD TR pts                            |       | 67.0 + 11.3 | 4.3 + 2.7              |         |

| Outpatient                     |       |             |                        |         | NCH                            |        |             |                        |         |
|--------------------------------|-------|-------------|------------------------|---------|--------------------------------|--------|-------------|------------------------|---------|
| Nausea/vomiting - 22.0% of AEs |       |             |                        |         | Nausea/vomiting – 45.7% of AEs |        |             |                        |         |
| Treatment                      | Pts   | Age + SD    | Comorbidity Index + SD | TR Freq | Treatment                      | Pts    | Age + SD    | Comorbidity Index + SD | TR Freq |
| Taxanes                        | 715   | 63.3 + 11.6 | 3.7 + 2.6              | 21.4%   | Taxanes                        | 6,221  | 65.2 + 10.8 | 3.6 + 2.5              | 27.1%   |
| Bisphosphonates                | 668   | 61.6 + 13.3 | 3.7 + 2.5              | 20.0%   | Her2 targeting agts.           | 4,071  | 64.3 + 11.1 | 3.5 + 2.5              | 17.7%   |
| Her2 targeting agts.           | 563   | 61.1 + 12.5 | 4.0 + 2.7              | 16.8%   | Pyrimidine analogs             | 2,659  | 63.8 + 11.1 | 3.4 + 2.4              | 11.6%   |
| Platinum cmpds.                | 345   | 61.5 + 11.3 | 3.4 + 2.7              | 10.3%   | Bisphosphonates                | 2,345  | 64.3 + 11.6 | 3.7 + 2.6              | 10.2%   |
| Pyrimidine analogs             | 338   | 61.9 + 10.6 | 3.7 + 2.8              | 10.1%   | Platinum cmpds                 | 1,775  | 64.9 + 10.2 | 3.6 + 2.5              | 7.7%    |
| Anthracyclines                 | 172   | 60.6 + 11.2 | 3.5 + 2.7              | 5.1%    | Vinca alkaloids                | 1,376  | 63.9 + 12.0 | 3.4 + 2.4              | 6.0%    |
| Antiestrogens                  |       | 65.5 + 10.9 | 4.0 + 2.5              | 4.8%    | Anthracyclines                 | 1,233  | 65.2 + 10.2 | 3.6 + 2.1              | 5.4%    |
| Total tallied                  | 2,960 |             |                        | 88.6%   | Total tallied                  | 18,680 |             |                        | 85.8%   |
| Mean+SD TR pts                 |       | 62.4 + 12.2 | 3.8 + 2.7              |         | Mean+SD TR pts                 |        | 65.1 + 11.3 | 3.6 + 2.5              |         |

| Outpatient                            |       |             |                        |         | NCH                                  |       |             |                        |         |
|---------------------------------------|-------|-------------|------------------------|---------|--------------------------------------|-------|-------------|------------------------|---------|
| Neutropenia/Leukopenia - 12.0% of AEs |       |             |                        |         | Neutropenia/Leukopenia – 7.2% of AEs |       |             |                        |         |
| Treatment                             | Pts   | Age + SD    | Comorbidity Index + SD | TR Freq | Treatment                            | Pts   | Age + SD    | Comorbidity Index + SD | TR_Freq |
| Taxanes                               | 561   | 61.5 + 11.9 | 3.3 + 2.5              | 30.7%   | Taxane                               | 965   | 64.8 + 11.4 | 3.7 + 2.6              | 26.9%   |
| Pyrimidine an.                        | 222   | 60.7 + 11.8 | 3.2 + 2.6              | 12.1%   | Her2 targeting agts                  | 653   | 63.7 + 11.2 | 3.5 + 2.3              | 18.2%   |
| Bisphosphonates                       | 217   | 62.2 + 11.2 | 3.4 + 2.3              | 11.9%   | Bisphosphonates                      | 382   | 64.0 + 11.8 | 3.3 + 2.3              | 10.6%   |
| Her2 targeting agts.                  | 179   | 58.8 + 13.1 | 3.2 + 2.2              | 9.8%    | Pyrimidine analogs                   | 326   | 63.3 + 10.9 | 3.5 + 2.6              | 9.1%    |
| Platinum cmpds.                       | 132   | 60.6 + 13.3 | 3.1 + 2.6              | 7.2%    | Vinca alkaloids                      | 321   | 63.9 + 11.7 | 3.7 + 2.4              | 8.9%    |
| Anthracyclines                        | 110   | 60.7 + 11.9 | 3.0 + 2.4              | 6.0%    | Platinum cmpd                        | 291   | 64.6 + 10.8 | 3.5 + 2.5              | 8.1%    |
| Alkylating agents                     | 108   | 60.9 + 11.3 | 3.3 + 2.3              | 5.9%    | Anthracyclines                       | 201   | 65.7 + 9.2  | 3.5 + 2.4              | 5.6%    |
| Vinca alkaloids                       | 103   | 59.4 + 12.7 | 3.1 + 2.6              | 5.6%    | VEGF inhibitor                       | 198   | 62.3 + 10.7 | 3.3 + 2.4              | 5.5%    |
| Total tallied                         | 1,632 |             |                        | 89.3%   | Total tallied                        | 3,337 |             |                        | 93.0%   |
| Mean+SD TR pts                        |       | 61.5 + 11.9 | 3.2 + 2.5              |         | Mean+SD TR pts                       |       | 65.0 + 11.0 | 3.6 + 2.5              |         |

| Outpatient                              |       |             |                        |         | NCH                                      |       |             |                        |         |
|-----------------------------------------|-------|-------------|------------------------|---------|------------------------------------------|-------|-------------|------------------------|---------|
| Electrolyte abnormalities – 4.1% of AEs |       |             |                        |         | Electrolyte abnormalities – 12.9% of AEs |       |             |                        |         |
| Treatment                               | Pts   | Age + SD    | Comorbidity Index + SD | TR_Freq | Treatment                                | Pts   | Age + SD    | Comorbidity Index + SD | TR Freq |
| Taxanes                                 | 1,167 | 64.1 + 10.7 | 4.1 + 2.5              | 30.6%   | Her2 targeting agts.                     | 1,406 | 64.4 + 12.0 | 4.0 + 2.5              | 21.7%   |
| Her2 targeting agts.                    | 657   | 64.5 + 10.9 | 4.2 + 2.4              | 17.2%   | Taxanes                                  | 1,141 | 64.4 + 10.9 | 4.0 + 2.7              | 17.6%   |
| Alkylating agents                       | 472   | 66.5 + 9.2  | 4.0 + 2.5              | 12.4%   | Pyrimidine analogs                       | 873   | 63.5 + 12.3 | 3.6 + 2.3              | 13.4%   |
| Platinum cmpds.                         | 355   | 63.6 + 11.4 | 4.0 + 2.3              | 9.3%    | Bisphosphonates                          | 706   | 65.0 + 12.0 | 4.0 + 2.6              | 10.9%   |
| Anthracyclines                          | 327   | 63.8 + 9.5  | 3.8 + 2.3              | 8.6%    | Vinca alkaloids                          | 393   | 63.8 + 11.8 | 4.0 + 2.4              | 6.1%    |
| Bisphosphonates                         | 252   | 61.6 + 12.5 | 4.1 + 2.5              | 6.6%    | VEGF inhibitors                          | 394   | 64.9 + 11.2 | 3.8 + 2.6              | 6.1%    |
| Pyrimidine analogs                      | 214   | 58.6 + 13.9 | 3.9 + 2.4              | 5.6%    | Folate analogs                           | 340   | 62.8 + 11.8 | 3.3 + 1.5              | 5.2%    |
|                                         |       |             |                        |         | Antiestrogens                            | 331   | 68.4 + 9.6  | 4.3 + 2.6              | 5.1%    |
| Total tallied                           | 3,444 |             |                        | 90.3%   |                                          | 5,584 |             |                        | 86.0%   |
| Mean+SD TR pts                          |       | 64.9 + 11.6 | 4.1 + 2.8              |         | Mean+SD TR pts                           |       | 65.2 + 11.6 | 3.9 + 2.6              |         |

**Table S7. Race distribution of the most frequent AEs in stage I-III Outpatient and NCH patients.**

| <b>Stage I-III</b>          |              |                 |                             |              |                 |
|-----------------------------|--------------|-----------------|-----------------------------|--------------|-----------------|
| <b>Outpatient</b>           |              |                 |                             |              |                 |
| <b>White Patients</b>       |              |                 | <b>AA patients</b>          |              |                 |
| AEs                         | AEs with TRs | % of all TR AEs | AEs                         | AEs with TRs | % of all TR AEs |
| Nausea/vomiting             | 16,689       | 25.9%           | Nausea/vomiting             | 4,462        | 28.0%           |
| Weakness/ malaise, delirium | 15,803       | 24.5%           | Weakness/ malaise, delirium | 3,100        | 19.4%           |
| Neutropenia/Leukopenia      | 9,805        | 15.2%           | Neutropenia/Leukopenia      | 2,747        | 17.2%           |
| Respiratory symptoms        | 4,948        | 7.7%            | Respiratory symptoms        | 1,208        | 7.6%            |
| Infection/fever             | 3,173        | 4.9%            | Anemias                     | 1,146        | 7.2%            |
| Anemias                     | 3,058        | 4.7%            | Infection/fever             | 737          | 4.6%            |
| Electrolyte abnormalities   | 2,872        | 4.5%            | Electrolyte abnormalities   | 721          | 4.5%            |
| Diarrhea                    | 2,303        | 3.6%            | Thrombophilia               | 541          | 3.4%            |
| Thrombophilia               | 1,945        | 3.0%            | Diarrhea                    | 453          | 2.8%            |
| Constipation                | 1,715        | 2.7%            | Constipation                | 407          | 2.6%            |
| Pulmonary Embolus           | 936          | 1.5%            | Weight loss/ malnutrition   | 191          | 1.2%            |
| Weight loss/ malnutrition   | 637          | 1.0%            | Pulmonary Embolus           | 180          | 1.1%            |
| Total tallied               | 63,884       | 99.2%           | Total tallied               | 15,893       | 99.6%           |
| <b>NCH</b>                  |              |                 |                             |              |                 |
| <b>White Patients</b>       |              |                 | <b>AA patients</b>          |              |                 |
| AEs                         | AEs with TRs | % of all TR AEs | AEs                         | AEs with TRs | % of all TR AEs |
| Nausea/vomiting             | 150,199      | 53.8%           | Nausea/vomiting             | 16,677       | 51.6%           |
| Weakness/ malaise, delirium | 25,975       | 9.3%            | Anemias                     | 3,718        | 11.5%           |
| Neutropenia/Leukopenia      | 24,810       | 8.9%            | Electrolyte abnormalities   | 3,627        | 11.2%           |
| Electrolyte abnormalities   | 23,501       | 8.4%            | Neutropenia/Leukopenia      | 3,187        | 9.9%            |
| Anemias                     | 21,080       | 7.5%            | Weakness/ malaise, delirium | 2,132        | 6.6%            |
| Respiratory symptoms        | 10,178       | 3.6%            | Respiratory symptoms        | 1,035        | 3.2%            |
| Infection/fever             | 8,781        | 3.1%            | Infection/fever             | 816          | 2.5%            |
| Thrombophilia               | 4,939        | 1.8%            | Thrombophilia               | 442          | 1.4%            |
| Diarrhea                    | 2,904        | 1.0%            |                             |              |                 |
| Total tallied               | 272,367      | 97.5%           | Total tallied               | 31,634       | 97.9%           |

**Table S8. Race distribution of the most frequent AEs in stage IV Outpatient and NCH patients.**

| <b>Stage IV</b>             |              |                 |                             |              |                 |
|-----------------------------|--------------|-----------------|-----------------------------|--------------|-----------------|
| <b>Outpatient</b>           |              |                 |                             |              |                 |
| <b>White Patients</b>       |              |                 | <b>AA patients</b>          |              |                 |
| AEs                         | AEs with TRs | % of all TR AEs | AEs                         | AEs with TRs | % of all TR AEs |
| Weakness/ malaise, delirium | 2,919        | 24.7%           | Weakness/ malaise, delirium | 647          | 23.0%           |
| Nausea/vomiting             | 2,699        | 22.8%           | Nausea/vomiting             | 584          | 20.7%           |
| Neutropenia/Leukopenia      | 1,323        | 11.2%           | Neutropenia/Leukopenia      | 415          | 14.7%           |
| Respiratory symptoms        | 1,101        | 9.3%            | Respiratory symptoms        | 247          | 8.8%            |
| Anemias                     | 806          | 6.8%            | Anemias                     | 243          | 8.6%            |
| Thrombophilia               | 701          | 5.9%            | Infection/fever             | 164          | 5.8%            |
| Infection/fever             | 650          | 5.5%            | Electrolyte abnormalities   | 134          | 4.8%            |
| Electrolyte abn.            | 479          | 4.0%            | Diarrhea                    | 94           | 3.3%            |
| Constipation                | 337          | 2.8%            | Constipation                | 94           | 3.3%            |
| Pulmonary Embolus           | 330          | 2.8%            | Thrombophilia               | 83           | 2.9%            |
| Diarrhea                    | 311          | 2.6%            | Pulmonary Embolus           | 70           | 2.5%            |
|                             |              |                 | Weight loss/ malnutrition   | 36           | 1.3%            |
| Total tallied               | 11,656       | 98.5%           | Total tallied               | 2,811        | 99.8%           |
| <b>NCH</b>                  |              |                 |                             |              |                 |
| <b>White Patients</b>       |              |                 | <b>AA patients</b>          |              |                 |
| AEs                         | AEs with TRs | % of all TR AEs | AEs                         | AEs with TRs | % of all TR AEs |
| Nausea/vomiting             | 20317        | 46.7%           | Nausea/vomiting             | 1714         | 40.7%           |
| Weakness/ malaise, delirium | 5285         | 12.1%           | Electrolyte abnormalities   | 715          | 17.0%           |
| Electrolyte abnormalities   | 5162         | 11.9%           | Anemias                     | 507          | 12.0%           |
| Anemias                     | 3880         | 8.9%            | Neutropenia/Leukopenia      | 409          | 9.7%            |
| Neutropenia/Leukopenia      | 2996         | 6.9%            | Weakness/ malaise, delirium | 401          | 9.5%            |
| Respiratory symptoms        | 2196         | 5.0%            | Respiratory symptoms        | 196          | 4.7%            |
| Infection/fever             | 1001         | 2.3%            | Infection/fever             | 97           | 2.3%            |
| Thrombophilia               | 984          | 2.3%            | Pulmonary Embolus           | 69           | 1.6%            |
| Pulmonary Embolus           | 552          | 1.3%            |                             |              |                 |
| Diarrhea                    | 499          | 1.1%            |                             |              |                 |
| Total tallied               | 42872        | 98.5%           | Total tallied               | 4108         | 97.5%           |
